# Supplementary material for: Distinct Photochemistry in Glycine Particles Mixed with Different Atmospheric Nitrate Salts
Source: Copernicus journal article supplement (doi:10.5194/egusphere-2023-1072), 2023-06-01
Supplement: Supplementary file 1 [file egusphere-2023-1072-supplement.pdf]

## Supplementary Information

### **Distinct Photochemistry in Glycine Particles Mixed with Different Atmospheric Nitrate Salts**

Zhancong Liang<sup>1,2</sup>, Zhihao Cheng<sup>1</sup>, Ruifeng Zhang<sup>1,2</sup>, Chak K. Chan<sup>1,3\*</sup>

<sup>1</sup>School of Energy and Environment, City University of Hong Kong, Hong Kong, China.

<sup>2</sup>City University of Hong Kong Shenzhen Research Institute, Shenzhen, China

<sup>3</sup>Division of Physical Science and Engineering, King Abdullah University of Science and Technology, Thuwal, 23955-6900, Saudi Arabia

*Correspondence to:* Chak K. Chan (chak.k.chan@cityu.edu.hk; chak.chan@kaust.edu.sa)

#### **Content**

**Figure S1.** The schematic of the aerosol flow-cell system.

**Figure S2.** The schematic of the aqueous reactor system.

**Figure S3.** The Full width at half maxima of nitrate peak and glycine peak in AN+GC particles at different RHs.

**Figure S4.** The Raman characteristic peak of GSN.

**Figure S5.** Ionic chromatography of Fresh and UV-aged AN+GC and SN+GC particles extract.

**Figure S6.** Raman spectrum of ammonium acetate solution.

**Figure S7.** The decay kinetics of nitrate in AN+GC and SN+GC particles at 80% RH.

**Figure S8.** Raman spectrum of AN+Ala and SN+Ala mixed particles after 0 and 8 h irradiation at 80%RH.

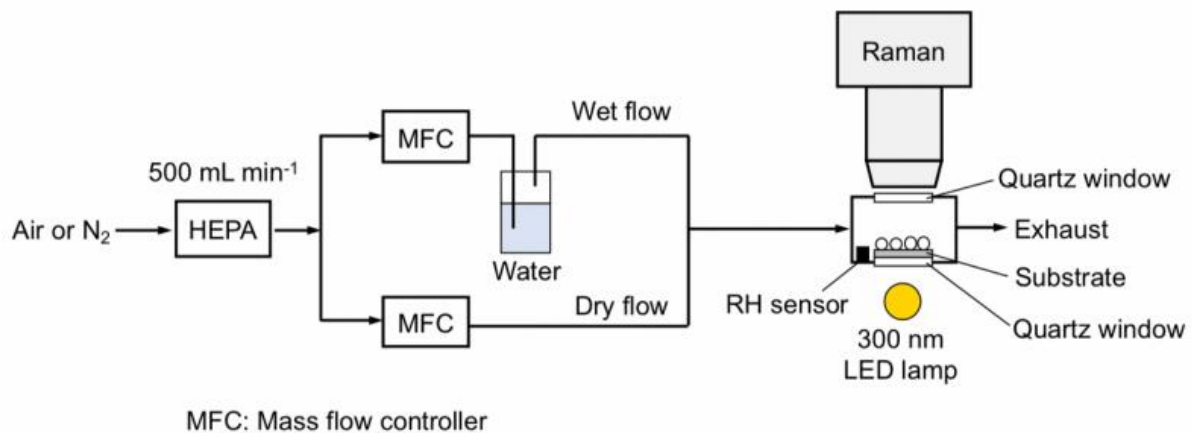

**Figure S1.** The schematic of the aerosol flow-cell system.

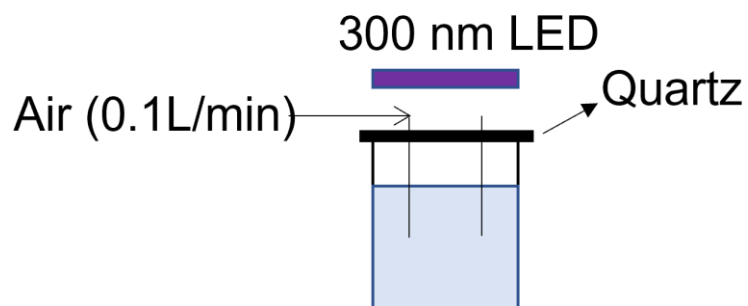

**Figure S2.** The schematic of the aqueous reactor system.

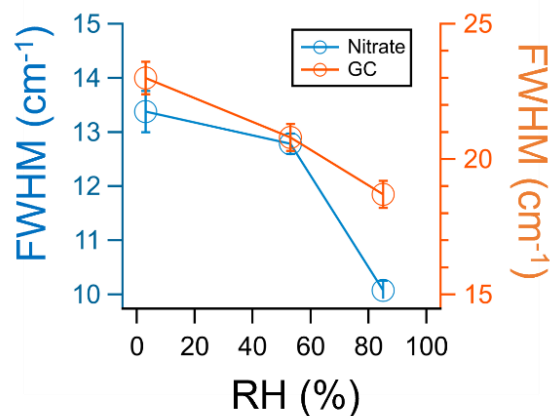

**Figure S3.** The Full width at half maxima of nitrate peak (at  $\sim 1050\text{ cm}^{-1}$ ) and glycine peak ( $\sim 900\text{ cm}^{-1}$ ) in AN+GC particles at different RHs.

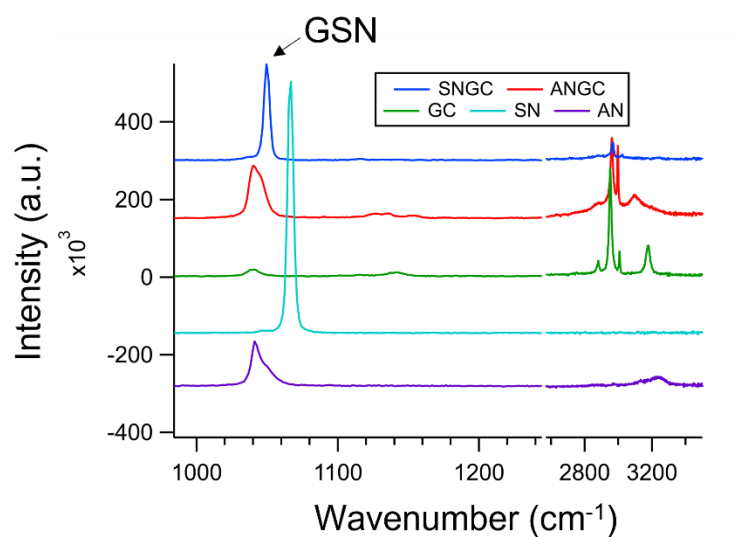

**Figure S4.** The Raman characteristic peak of GSN.

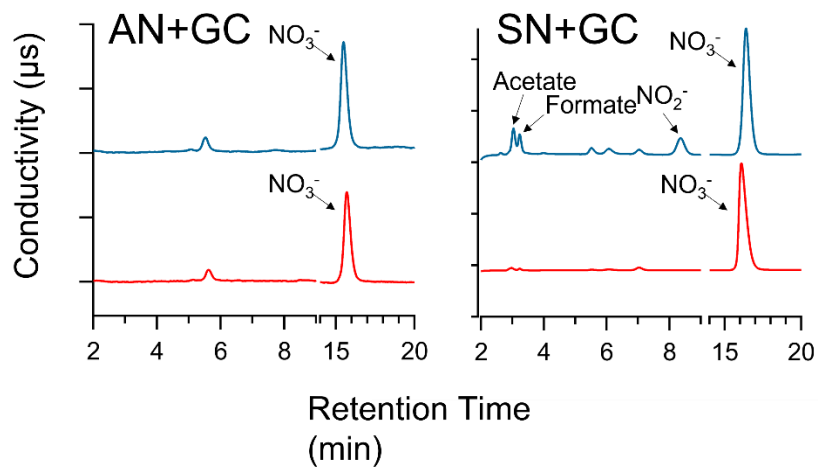

**Figure S5.** Ionic chromatography of Fresh and UV-aged (8 h) AN+GC and SN+GC particles extract. The particles were aged at 80%RH.

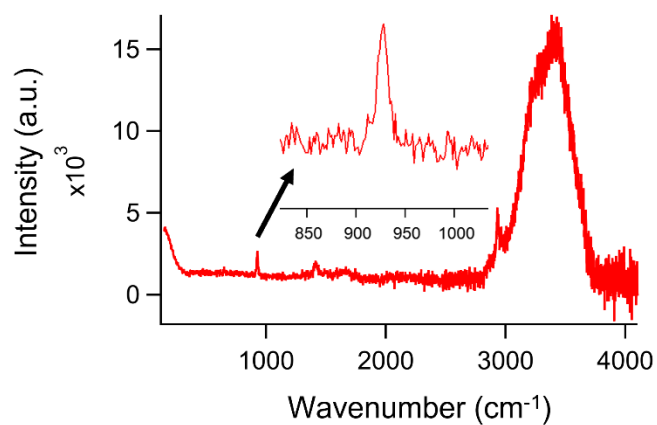

**Figure S6.** Raman spectrum of ammonium acetate solution.

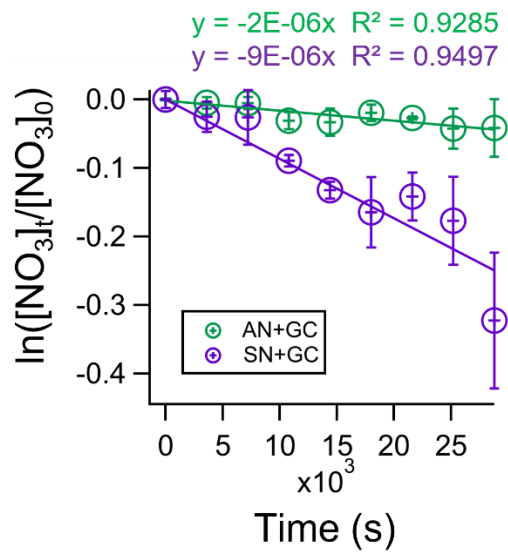

**Figure S7.** The decay kinetics of nitrate in AN+GC and SN+GC particles at 80% RH.

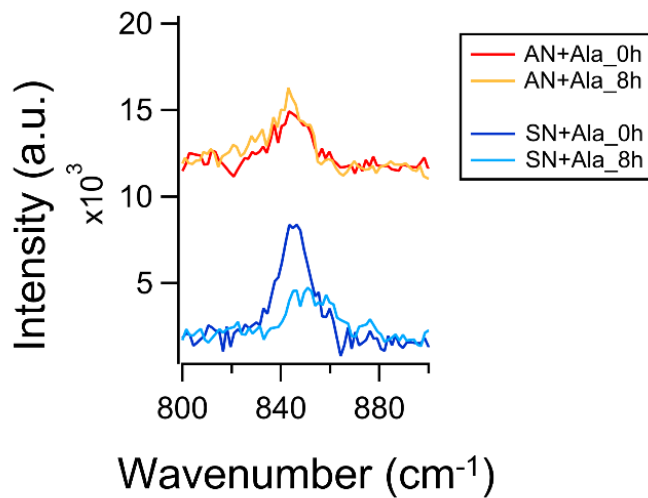

**Figure S8.** Raman spectrum of AN+Ala and SN+Ala mixed particles after 0 and 8 h irradiation at 80%RH.
