# Supplementary material for: Distinct Photochemistry in Glycine Particles Mixed with Different Atmospheric Nitrate Salts
Source: Copernicus journal article supplement (doi:10.5194/egusphere-2023-1072), 2023-06-01
Supplement: Supplementary file [file egusphere-2023-1072-RC5-supplement.pdf]

Slips of the pen both in sentences and equations have been rectified, and the answers of questions are satisfactory. The manuscript can be considered for publication.
